# Supplementary material
Source: PubMed Central journal article supplement (PMC3406862)
Supplement: 1203743109_pnas.1203743109_SI.pdf [file 1203743109_pnas.1203743109_SI.pdf]

# Supporting Information

Ge et al. 10.1073/pnas.1203743109

## SI Text

**Cyclic Voltammetry Simulations.** The cyclic voltammograms simulated were obtained by using Digisim 3.03 assuming the following set of reactions:

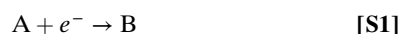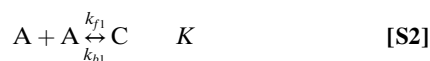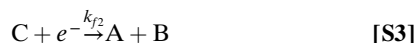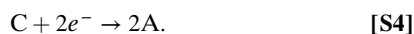

Here, A, B, C, and D represent osmocene ( $\text{Cp}_2\text{Os}$ ),  $[\text{Cp}_2\text{Os}^{\text{III}}]^+$ ,  $[\text{Cp}_2\text{Os}^{\text{III}}-\text{Os}^{\text{III}}\text{Cp}_2]^{2+}$  and the reduced product of the dimer, which could be osmocene. The reaction [S2] proceeds with the equilibrium constant  $K$  of 2,000 and reaction [S3] with  $k_{f2} = 0.065$ .

**$^1\text{H}$  NMR Measurements of Osmocenium Metal-Metal Dimer Reactivity with Water.** The new signal at 6.61 ppm was apparently one intermediate because it kept reacting in dark until its completion. Three other signals, one at 6.14 ppm (Product I) and the other two at 6.02 and 5.56 ppm (Product II), the intensities of which even increased in dark seemed to convert from the highly reactive intermediate ( $\delta = 6.61$  ppm). Further photolysis (Fig. S6), the three peaks disappeared, faster in the signal at 6.14 ppm and slower in 6.02 and 5.56 ppm (Fig. S6). The signals at 6.02 and 5.56 seem to belong to the same complex due to their similar behavior in photolysis.

**Density Functional Theory (DFT) Computations on  $\text{O}_2$  Reduction by Osmocene.** The reaction pathway computed for the reduction of oxygen by osmocene starts by formation of an oxygen-sandwich dimer  $[\text{Cp}_2\text{Os}^{\text{II}}-\text{O}_2-\text{Os}^{\text{II}}\text{Cp}_2]$  with an energy of  $-6$  ( $-4$ ) kcal/mol at the B3LYP-dDsC (M06L) level. Note that the complex does not bind at B3LYP level due to the missing weak interactions between oxygen and the two osmocenium units,

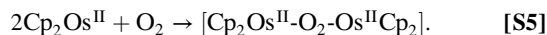

In the next step this dimer complex is protonated according to reaction [S6]:

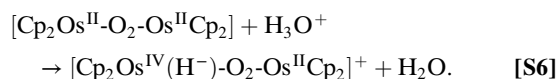

At the B3LYP-dDsC and M06L levels, the protonation of the metal is 10 and 12 kcal/mol (in 1,2-DCE) more favorable than the direct formation of  $\text{HO}_2 \cdot$ . The reaction mechanism is presented in Fig. S8 and is characterized by a reaction barrier of only 11 kcal/mol at B3LYP-dDsC and M06L levels followed by the formation of  $[\text{Cp}_2\text{Os}^{\text{III}}-\text{HO}_2-\text{Os}^{\text{II}}\text{Cp}_2]^+$ . Note that reaction mechanism involving protonation of one osmocene to form  $[\text{Cp}_2\text{Os}^{\text{IV}}(\text{H}^-)]^+$  that then reacts with  $\text{O}_2$  through a diradical triplet TS has a much higher barrier of 27 kcal/mol. The formation of  $\text{H}_2\text{O}_2$  arises from the direct protonation of the hydrogen peroxyl radical, which is 14 kcal/mol more favorable than protonating the second  $\text{Cp}_2\text{Os}^{\text{II}}$  unit,

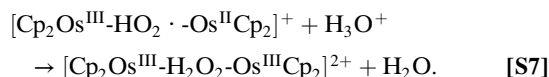

Reaction [S7] is exothermic ( $-15$  kcal/mol) at B3LYP-dDsC in 1,2-DCE. Without the dDsC dispersion correction, the complex  $[\text{Cp}_2\text{Os}^{\text{III}}-\text{H}_2\text{O}_2-\text{Os}^{\text{III}}\text{Cp}_2]^{2+}$  is not a stationary point on the potential energy surface. In the final step,  $\text{H}_2\text{O}_2$  is released from the sandwiched structure  $[\text{Cp}_2\text{Os}^{\text{III}}-\text{H}_2\text{O}_2-\text{Os}^{\text{III}}\text{Cp}_2]^{2+}$  and [S8] is energetically favored process ( $-8$  ( $-14$ ) kcal/mol at the B3LYP-dDsC (M06L) level in 1,2-DCE),

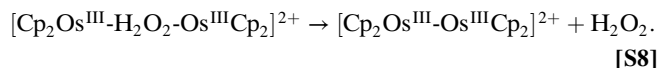

Overall, the reduction of oxygen by osmocene can be written as

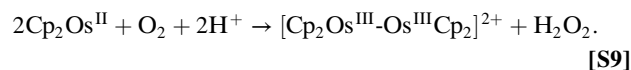

The reaction is highly exothermic ( $-42$  and  $-38$  kcal/mol at B3LYP-dDsC and M06L, respectively).





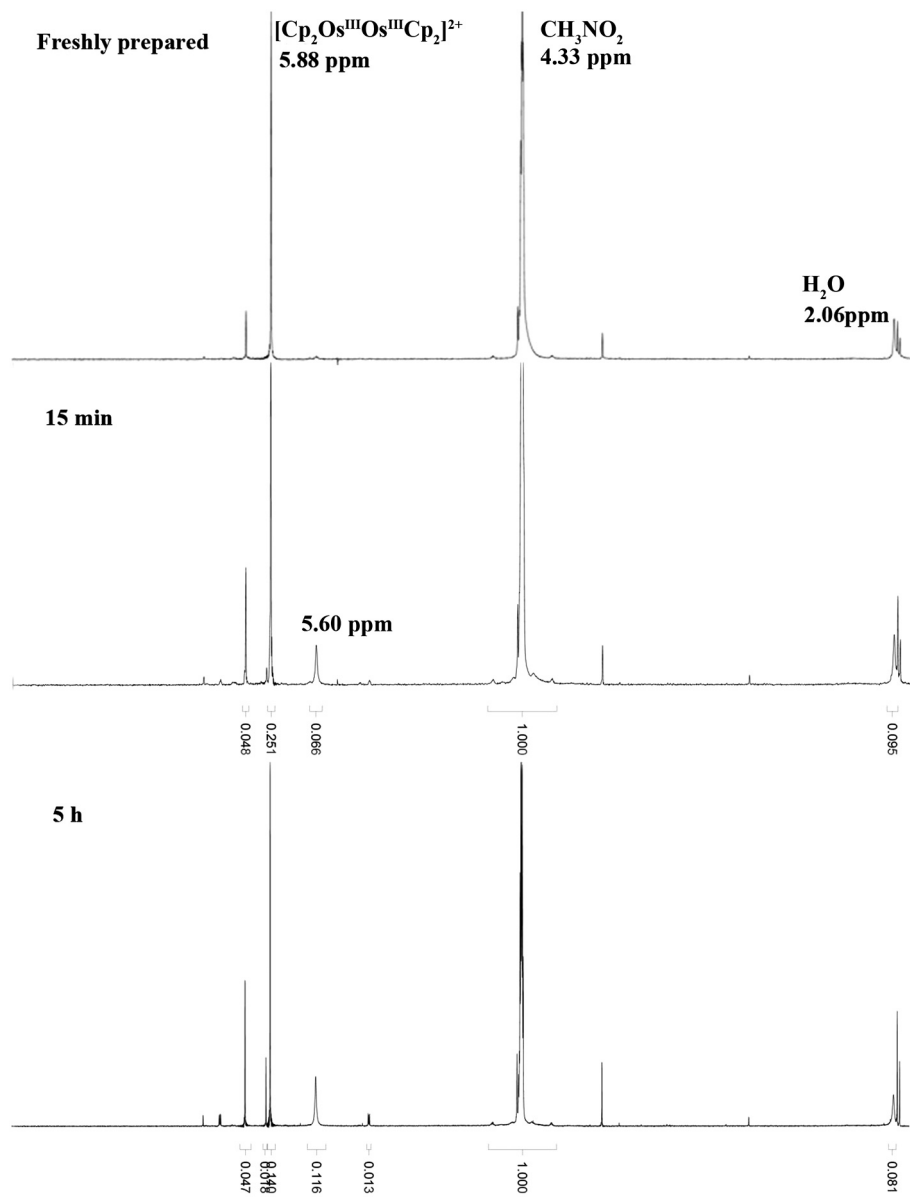

Fig. S3.  $^1\text{H}$  NMR of  $[\text{Cp}_2\text{Os}^{\text{III}}\text{Os}^{\text{III}}\text{Cp}_2]\text{TB}_2$  ( $\delta = 5.88$  ppm) in deuterated nitromethane ( $\text{CD}_3\text{NO}_2$ ) ( $\delta = 4.33$  ppm) phase with time.

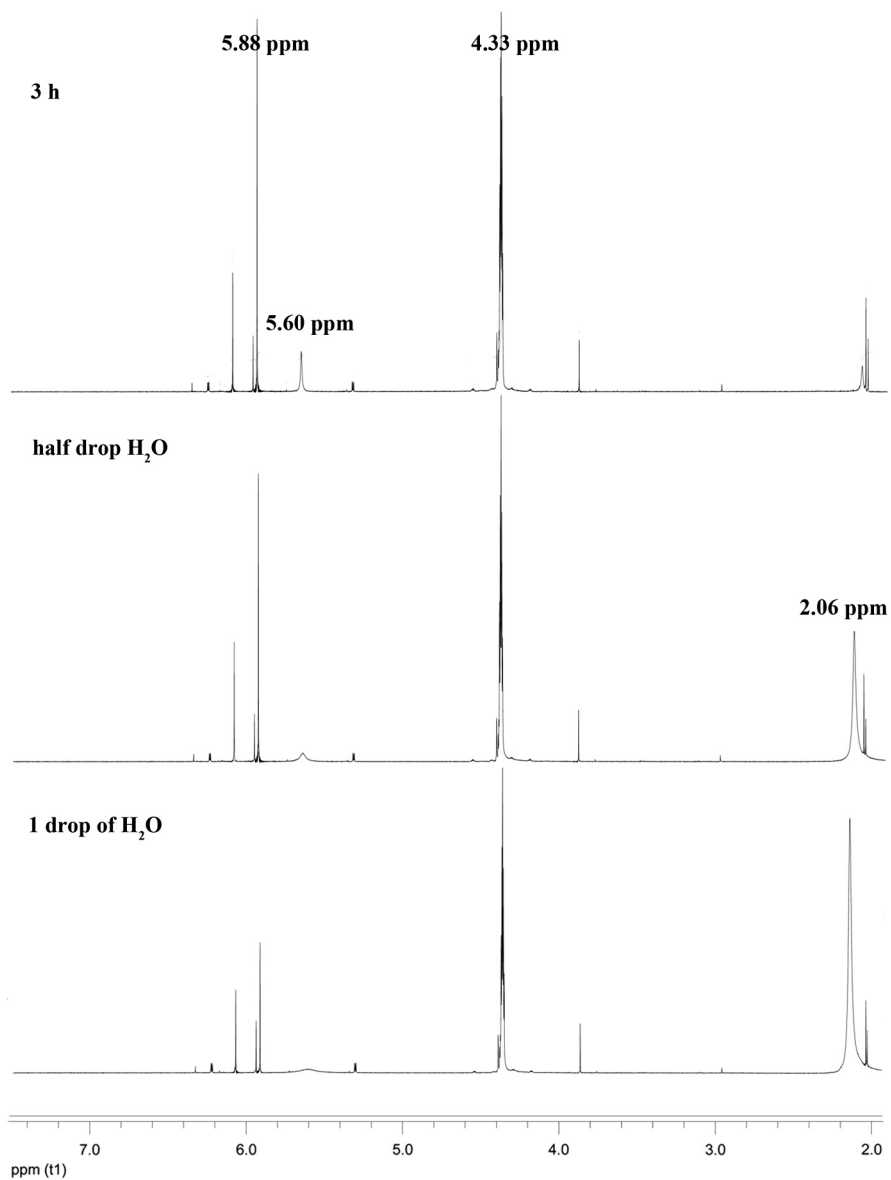

**Fig. S4.**  $^1\text{H}$  NMR of  $[\text{Cp}_2\text{Os}^{\text{III}}\text{-Os}^{\text{III}}\text{Cp}_2]\text{TB}_2$  in  $\text{CD}_3\text{NO}_2$  phase for 3 h under anaerobic conditions and upon addition of half drop (c.a.  $0.4\ \mu\text{L}$ ) and one drop (c.a.  $0.5\ \mu\text{L}$ ) of  $\text{H}_2\text{O}$  ( $\delta = 2.06\ \text{ppm}$ ).



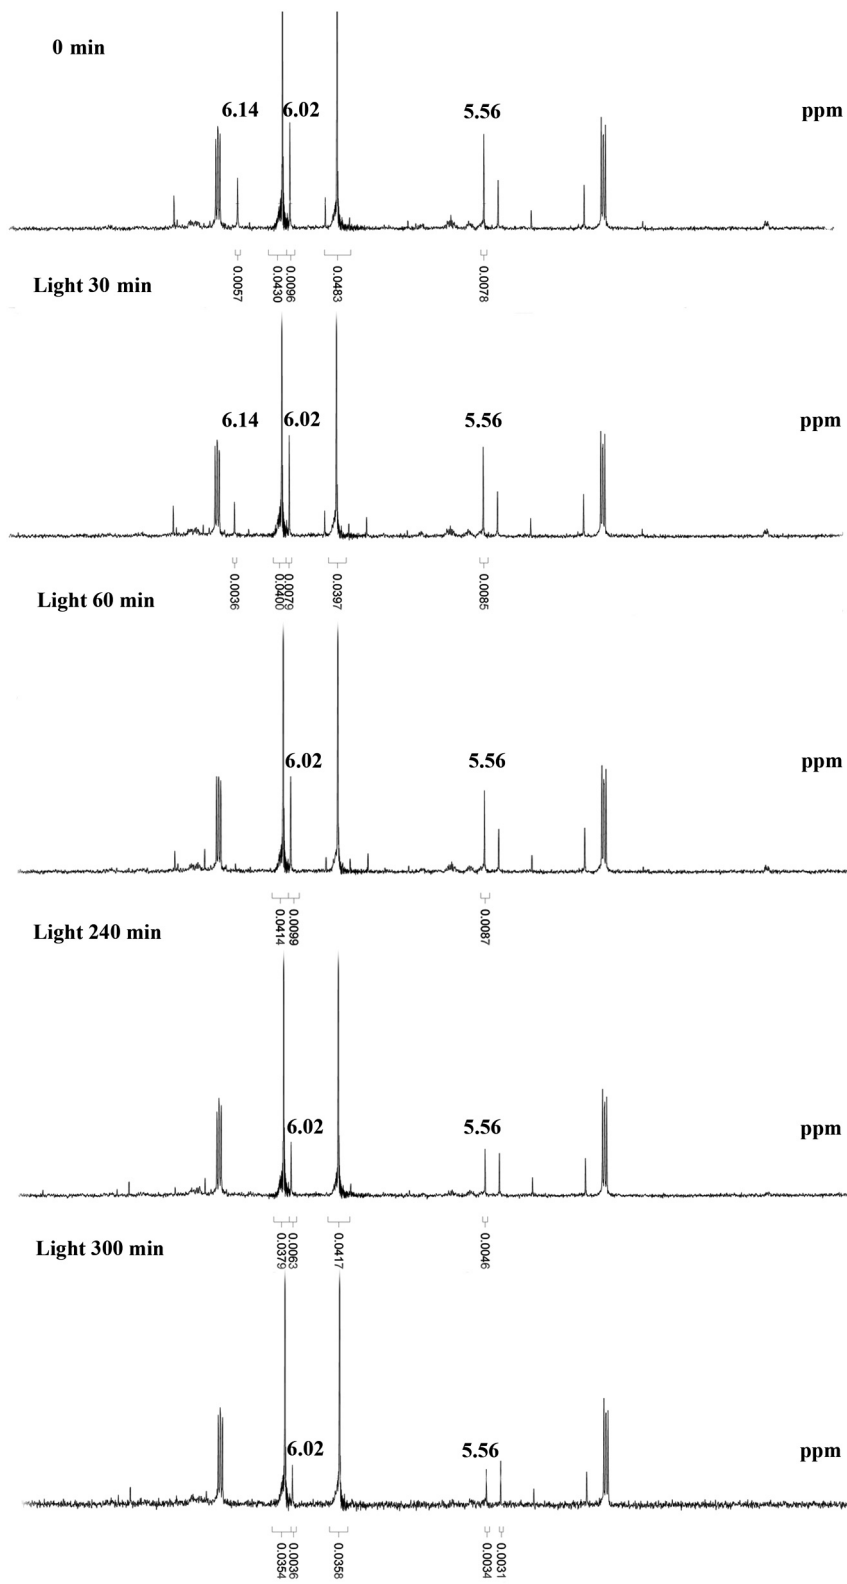

Fig. S6. <sup>1</sup>H NMR of products in Fig. S5 upon irradiation of white light.
